# Supplementary material for: TANK-binding kinase 1 (TBK1) modulates inflammatory hyperalgesia by regulating MAP kinases and NF-κB dependent genes
Source: Springer Nature journal article supplement (doi:10.1186/s12974-015-0319-3), 2015-05-22

**Suppl. Figure 1:** Western Blot analysis (A) and immunofluorescence (B, C) of TBK1 in different mouse genotypes to confirm specificity of the antibody

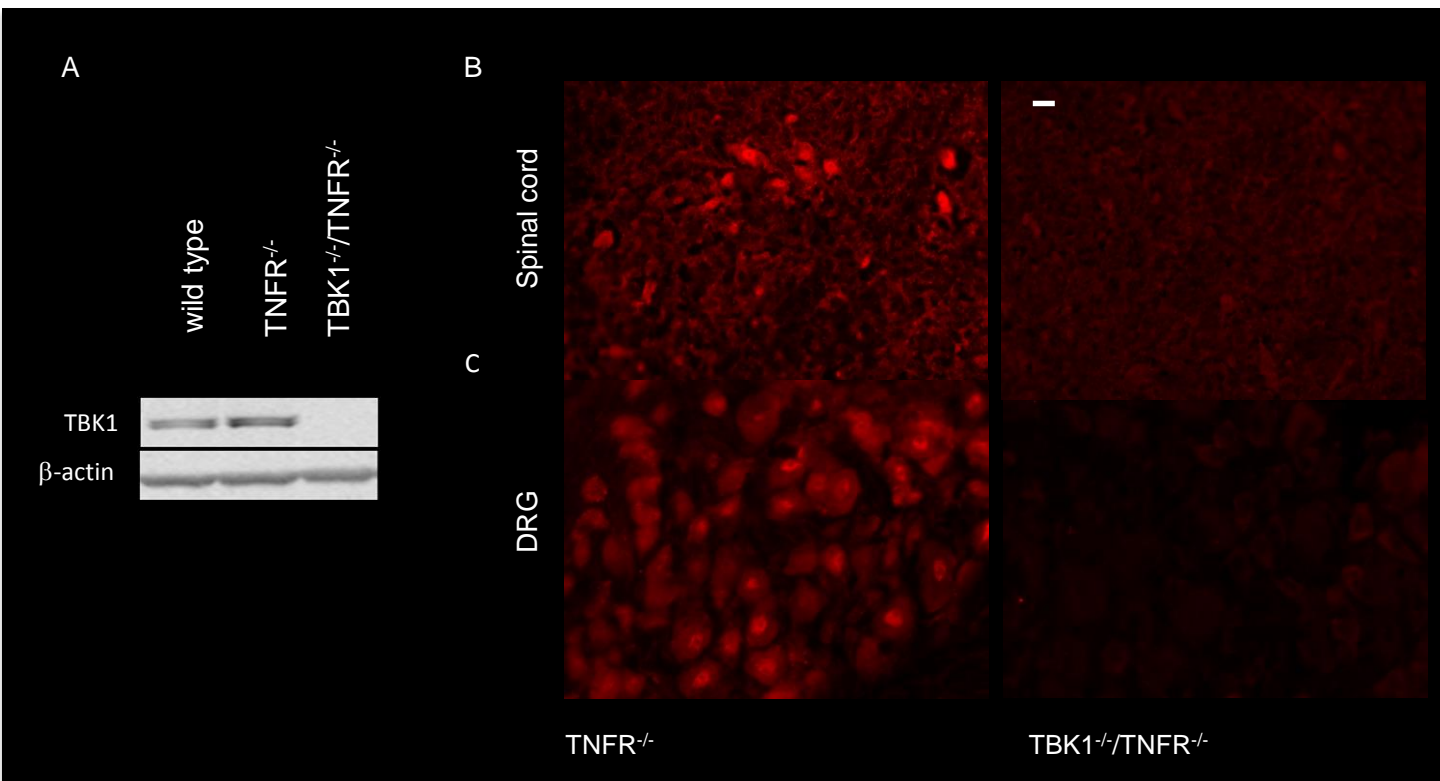

Supplement: MOESM2 [file 9768694]
