# Supplementary material for: TANK-binding kinase 1 (TBK1) modulates inflammatory hyperalgesia by regulating MAP kinases and NF-κB dependent genes
Source: Springer Nature journal article supplement (doi:10.1186/s12974-015-0319-3), 2015-05-22

**Suppl. Figure 5: Effects of celecoxib on zymosan-induced hyperalgesia in mice with different genotypes**

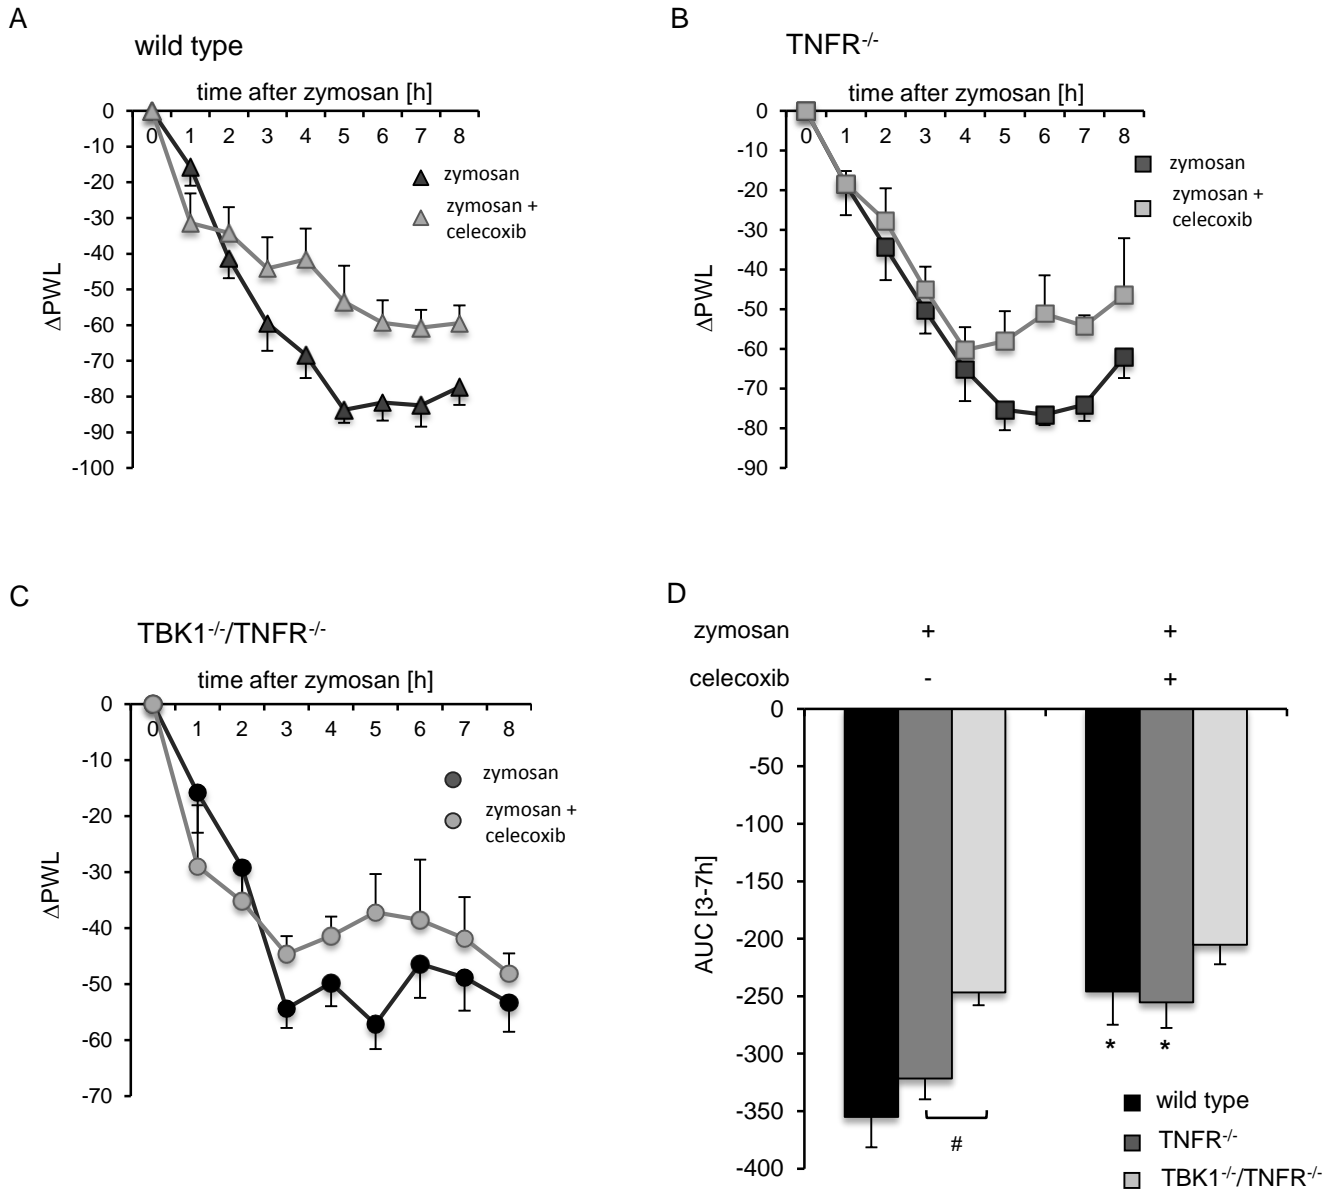

Supplement: MOESM6 [file 9768694]
